# Supplementary material for: Inch-sized single crystals of radiation-sensitive copper-based hybrid perovskites for direct X-ray detection
Source: Royal Society of Chemistry journal article supplement (doi:10.1039/d5qi00263j), 2025-01-01
Supplement: d5qi00263j1.pdf [file d5qi00263j1.pdf]

## Supplementary Information

# Inch-sized single crystal of radiation-sensitive copper-based hybrid perovskite for direct X-ray detection

Yicong Lv<sup>a,b</sup>, Xiantan Lin<sup>a,b</sup>, Fafa Wu<sup>a</sup>, Zengshan Yue<sup>a</sup>, Xiaoqi Li<sup>b</sup>, Fen Zhang<sup>a,b</sup>, Qingyin Wei<sup>a</sup>, Kai Li<sup>a</sup>, Qianxi Wang<sup>a</sup>, Junhua Luo<sup>a,b,c</sup> and Xitao Liu<sup>\*a,b,c</sup>

a. State Key Laboratory of Functional Crystals and Devices, Fujian Institute of Research on the Structure of Matter, Chinese Academy of Sciences, Fujian 350002, China.

b. College of Chemistry and Materials Science, Fujian Normal University, Fuzhou, 350007, P. R. China.

c. University of Chinese Academy of Sciences, Beijing 100049, China.

Email: xtlou@fjirsm.ac.cn

## Experiment

### Synthesis and crystal growth

CuCO<sub>3</sub>·Cu(OH)<sub>2</sub> (0.22 g, 1 mmol) was dissolved in a 38% w/w aqueous HCl solution (5 mL) by heating under constant stirring. Subsequently, 2,2-difluoroethanamine (0.167 g, 2 mmol) was added to form (2FEA)<sub>2</sub>CuCl<sub>4</sub> microcrystals in the solution. This solution was heated until the initial microcrystalline was completely dissolved. Large crystals grew in a closed temperature-controlled oven. The temperature decreased at the rate of 1 K day<sup>-1</sup>. A few days later, a size of 30 × 28 × 0.5 mm<sup>3</sup> single crystal was acquired.

### Single crystal and powder X-ray diffraction

We utilized Mo K $\alpha$  radiation at 200 K on a Super Nova diffractometer to obtain single crystal X-ray diffraction (SC-XRD) data for (2FEA)<sub>2</sub>CuCl<sub>4</sub>. Our crystal structure was solved through the direct method and refined by full-matrix least-squares method refinements on F2 using the SHELXL software. Using the difference Fourier transform, we determined the non-hydrogen atoms and hydrogenated the hydrogen atoms according to our knowledge of structural chemistry. **Table S1** outlines the crystal data and structural refinement of (2FEA)<sub>2</sub>CuCl<sub>4</sub>. We also performed powder X-ray diffraction of (2FEA)<sub>2</sub>CuCl<sub>4</sub> on a Rigaku by MiniFlex 600 diffractometer at room temperature, collecting diffractograms at a scan speed of 7.0 degrees per minute over a 2 $\theta$  range from 5° to 40°.

### Optical measurement

UV-visible diffuse reflectance spectroscopy was carried out at ambient temperature, with the scanning wavelength ranging from 200 to 800 nm, using a Lambda 950 spectrometer. The reference material with a reflectivity of 100% was BaSO<sub>4</sub>.

### Fabrication and measurement of X-ray detector

The vertical-type detectors have been engineered to stand perpendicular to the surface of (2FEA)<sub>2</sub>CuCl<sub>4</sub> single crystals. Silver (Ag) electrodes were evenly applied across the opposing faces of the crystal, which measures 0.7 mm in thickness, covering an electrode area of 5.2 mm<sup>2</sup>. We conducted the photoconductive assessments in the presence of X-ray radiation, set at an energy level of 80 keV. The rate of radiation dose was precisely calibrated using a standard commercial dosimeter.

### Degree of octahedral distortion

The average octahedral elongation,  $\Delta d$ , is calculated as:

$$\Delta d = \sum_{i=1}^6 \frac{(d_i - d_0)^2}{6}$$

where  $d_i$  represents the individual Cu-Cl bond lengths and  $d_0$  is the average Cu-Cl bond length. Calculated according to **Table S2**,  $\Delta d$  is 0.01454.

The bond angle variance,  $\sigma^2$ , is calculated as:

$$\sigma^2 = \sum_{i=1}^{12} \frac{(\theta_i - 90^\circ)^2}{11}$$

where  $\theta_i$  represents the individual Cl-Cu-Cl bond angles. Calculated according to **Table S3**,  $\sigma^2$  is 0.46.

**Table S1 Crystal data and structure refinement for (2FEA)<sub>2</sub>CuCl<sub>4</sub>.**

| <b>Identification code</b>                                   | <b>(2FEA)<sub>2</sub>CuCl<sub>4</sub></b>                                      |
|--------------------------------------------------------------|--------------------------------------------------------------------------------|
| Empirical formula                                            | C <sub>4</sub> H <sub>12</sub> Cl <sub>4</sub> CuF <sub>4</sub> N <sub>2</sub> |
| Formula weight                                               | 369.50                                                                         |
| Temperature/K                                                | 300.16                                                                         |
| Crystal system                                               | monoclinic                                                                     |
| Space group                                                  | <i>C2/c</i>                                                                    |
| <i>a</i> /Å                                                  | 22.958(5)                                                                      |
| <i>b</i> /Å                                                  | 7.4311(13)                                                                     |
| <i>c</i> /Å                                                  | 7.3162(13)                                                                     |
| $\alpha$ /°                                                  | 90                                                                             |
| $\beta$ /°                                                   | 90                                                                             |
| $\gamma$ /°                                                  | 90                                                                             |
| Volume/Å <sup>3</sup>                                        | 1248.2(4)                                                                      |
| <i>Z</i>                                                     | 4                                                                              |
| $\rho_{\text{calc}}$ /g/cm <sup>3</sup>                      | 1.966                                                                          |
| $\mu$ /mm <sup>-1</sup>                                      | 2.625                                                                          |
| <i>F</i> (000)                                               | 732.0                                                                          |
| Crystal size/mm <sup>3</sup>                                 | 30 × 28 × 0.5                                                                  |
| Radiation                                                    | MoK $\alpha$ ( $\lambda$ = 0.71073)                                            |
| 2 $\Theta$ range for data collection/°                       | 5.762 to 55.002                                                                |
| Index ranges                                                 | -29 ≤ <i>h</i> ≤ 28, -9 ≤ <i>k</i> ≤ 8, -9 ≤ <i>l</i> ≤ 8                      |
| Reflections collected                                        | 3437                                                                           |
| Independent reflections                                      | 1421 [ <i>R</i> <sub>int</sub> = 0.0776, <i>R</i> <sub>sigma</sub> = 0.0828]   |
| Data/restraints/parameters                                   | 1421/49/72                                                                     |
| Goodness-of-fit on <i>F</i> <sup>2</sup>                     | 1.149                                                                          |
| Final <i>R</i> indexes [ <i>I</i> ≥ 2 $\sigma$ ( <i>I</i> )] | <i>R</i> <sub>1</sub> = 0.1419, <i>wR</i> <sub>2</sub> = 0.3735                |
| Final <i>R</i> indexes [all data]                            | <i>R</i> <sub>1</sub> = 0.1549, <i>wR</i> <sub>2</sub> = 0.3849                |
| Largest diff. peak/hole / e Å <sup>-3</sup>                  | 1.56/-1.07                                                                     |

**Table S2 Bond Lengths for (2FEA)<sub>2</sub>CuCl<sub>4</sub>.**

| <b>Atom</b> | <b>Atom</b> | <b>Length/Å</b> |
|-------------|-------------|-----------------|
| Cu (01)     | Cl (02)1    | 2.303(3)        |
| Cu (01)     | Cl (02)     | 2.303(3)        |
| Cu (01)     | Cl (02)2    | 2.925(3)        |
| Cu (01)     | Cl (03)     | 2.269(4)        |
| Cu (01)     | Cl (03)1    | 2.269(4)        |
| N (1)       | C (5)       | 1.48(5)         |
| C (5)       | C (8)       | 1.406(19)       |
| C (8)       | F (1)       | 1.347(14)       |
| C (8)       | F (2)       | 1.355(14)       |

**Table S3 Bond Angle for (2FEA)<sub>2</sub>CuCl<sub>4</sub>**

| Atom              | Atom | Atom              | Angle/°   | Atom              | Atom | Atom              | Angle/°   |
|-------------------|------|-------------------|-----------|-------------------|------|-------------------|-----------|
| Cl02              | Cu01 | Cl02 <sup>1</sup> | 180.0     | Cl03 <sup>1</sup> | Cu01 | Cl02 <sup>2</sup> | 89.90(16) |
| Cl02              | Cu01 | Cl02 <sup>2</sup> | 90.95(3)  | Cl03              | Cu01 | Cl02 <sup>3</sup> | 89.90(16) |
| Cl02              | Cu01 | Cl02 <sup>3</sup> | 89.05(3)  | Cl03 <sup>1</sup> | Cu01 | Cl02 <sup>3</sup> | 90.10(16) |
| Cl02 <sup>3</sup> | Cu01 | Cl02 <sup>2</sup> | 180.0     | Cl03              | Cu01 | Cl02 <sup>2</sup> | 90.10(16) |
| Cl02 <sup>1</sup> | Cu01 | Cl02 <sup>2</sup> | 89.05(3)  | Cl03 <sup>1</sup> | Cu01 | Cl03              | 180.00(2) |
| Cl02 <sup>1</sup> | Cu01 | Cl02 <sup>3</sup> | 90.95(3)  | C8                | C5   | N1                | 114(3)    |
| Cl03              | Cu01 | Cl02              | 90.52(18) | F1                | C8   | C5                | 119(5)    |
| Cl03 <sup>1</sup> | Cu01 | Cl02              | 89.48(18) | F1                | C8   | F2                | 96(4)     |
| Cl03 <sup>1</sup> | Cu01 | Cl02 <sup>1</sup> | 90.52(18) | F2                | C8   | C5                | 119(3)    |
| Cl03              | Cu01 | Cl02 <sup>1</sup> | 89.48(18) |                   |      |                   |           |

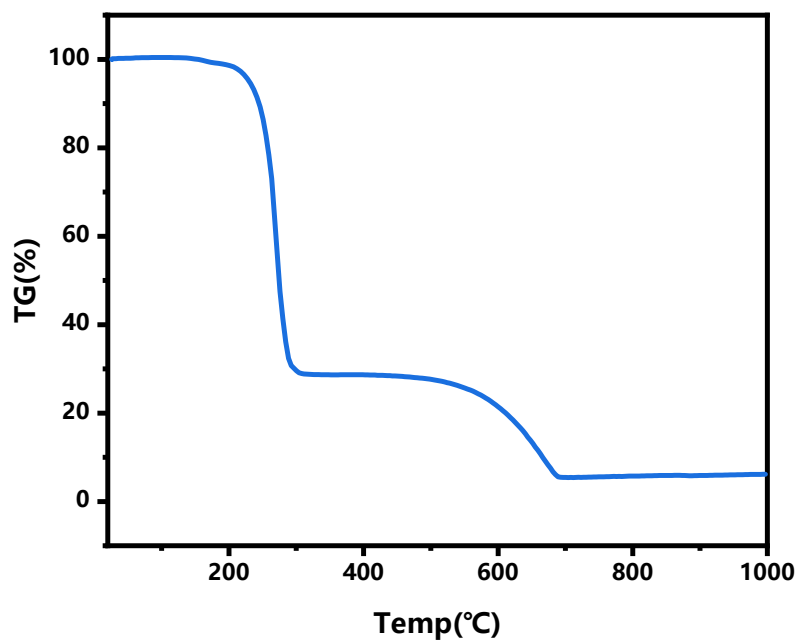**Figure S1 The TG curve of (2FEA)<sub>2</sub>CuCl<sub>4</sub>.**

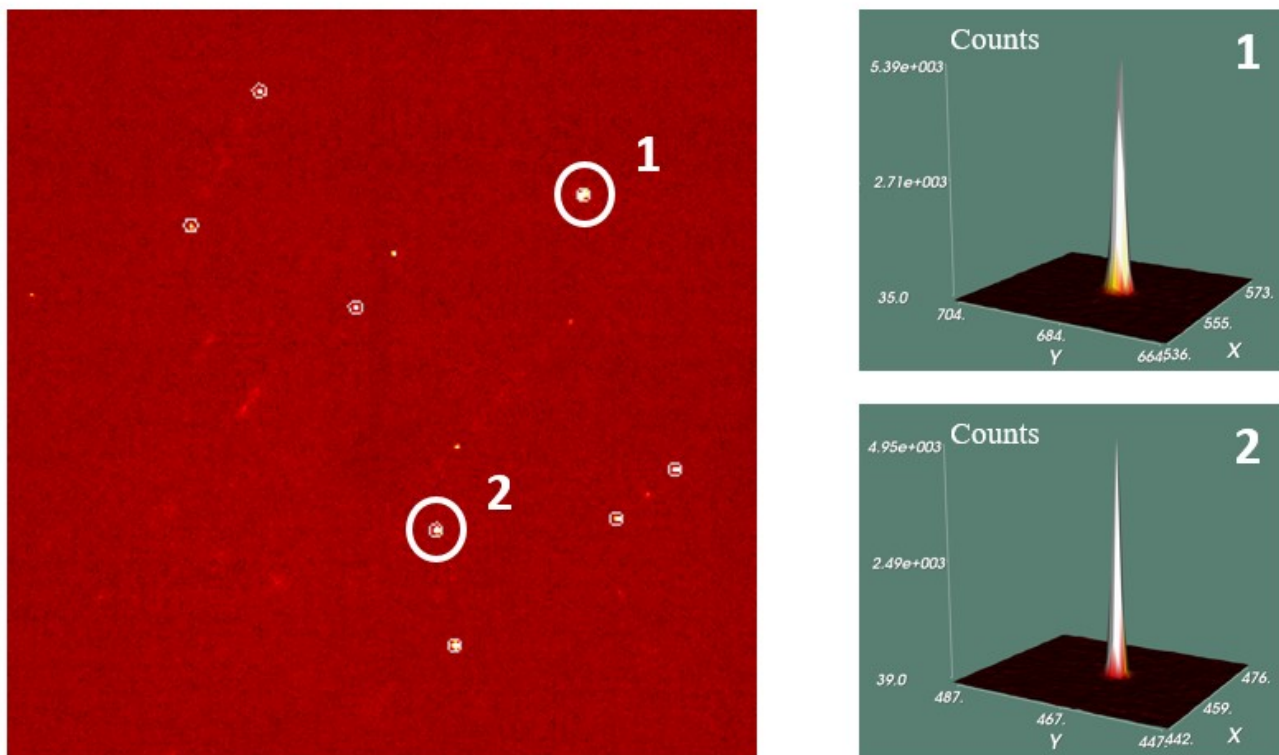

**Figure S2** SCXRD diffraction spots of  $(2\text{FEA})_2\text{CuCl}_4$ .

**Table S4** Performances of some reported halide perovskite X-ray SC detectors.

| Compound                                    | Dimensionality | $\mu\tau$<br>( $\text{cm}^2 \text{V}^{-1}$ ) | LoD<br>( $\mu\text{Gy s}^{-1}$ ) | Sensitivity<br>( $\mu\text{C Gy}^{-1} \text{cm}^{-2}$ ) | Refs.     |
|---------------------------------------------|----------------|----------------------------------------------|----------------------------------|---------------------------------------------------------|-----------|
| (3AP)PbCl <sub>4</sub>                      | 2D             | $2.74 \times 10^{-3}$                        | 1.54                             | 791.8                                                   | 1         |
| (3AP)PbBr <sub>4</sub>                      | 2D             | $2.38 \times 10^{-3}$                        | 3.04                             | 348.6                                                   | 1         |
| (3AP)PbI <sub>4</sub>                       | 2D             | $2.61 \times 10^{-3}$                        | 3.483                            | 124.9                                                   | 1         |
| (BDA)PbI <sub>4</sub>                       | 2D             | $4.43 \times 10^{-4}$                        | 0.34                             | 242                                                     | 2         |
| MAPbBr <sub>3</sub>                         | 3D             | $1.2 \times 10^{-2}$                         | 0.5                              | 80                                                      | 3         |
| (R-<br>MPA) <sub>4</sub> AgBiI <sub>8</sub> | 2D             | $2.2 \times 10^{-5}$                         | 0.547                            | 949.6                                                   | 4         |
| $(2\text{FEA})_2\text{CuCl}_4$              | 2D             | $5.06 \times 10^{-4}$                        | 0.130                            | 1106.44                                                 | This work |

### Reference

1. C. Ma, L. Gao, Z. Xu, X. Li, X. Song, Y. Liu, T. Yang, H. Li, Y. Du, G. Zhao, X. Liu, M. G. Kanatzidis, S. F. Liu and K. Zhao, Centimeter-Sized 2D Perovskitoid Single Crystals for Efficient X-ray Photoresponsivity, *Chem. Mat.*, 2022, **34**, 1699-1709.
2. Y. Shen, Y. Liu, H. Ye, Y. Zheng, Q. Wei, Y. Xia, Y. Chen, K. Zhao, W. Huang and S. F. Liu, Centimeter-Sized Single Crystal of Two-Dimensional Halide Perovskites Incorporating Straight-Chain Symmetric Diammonium Ion for X-Ray Detection, *Angew. Chem. Int. Ed.*, 2020, **59**, 14896-14902.
3. H. Wei, Y. Fang, P. Mulligan, W. Chuirazzi, H.-H. Fang, C. Wang, B. R. Ecker, Y. Gao, M. A. Loi, L. Cao and J. Huang, Sensitive X-ray detectors made of methylammonium lead tribromide perovskite single

crystals, *Nat. Photonics*, 2016, **10**, 333-339.

4. J. Wu, S. You, P. Yu, Q. Guan, Z.-K. Zhu, Z. Li, C. Qu, H. Zhong, L. Li and J. Luo, Chirality Inducing Polar Photovoltage in a 2D Lead-Free Double Perovskite toward Self-Powered X-ray Detection, *ACS Energy Lett.*, 2023, **8**, 2809-2816.
